# Supplementary material for: Cyclosporine A loaded self-nanoemulsifying drug delivery system (SNEDDS): implication of a functional excipient based co-encapsulation strategy on oral bioavailability and nephrotoxicity
Source: Royal Society of Chemistry journal article supplement (doi:10.1039/c5ra04762e), 2015-01-01
Supplement: c5ra04762e1.pdf [file c5ra04762e1.pdf]

## Supplementary information

### Compatibility studies

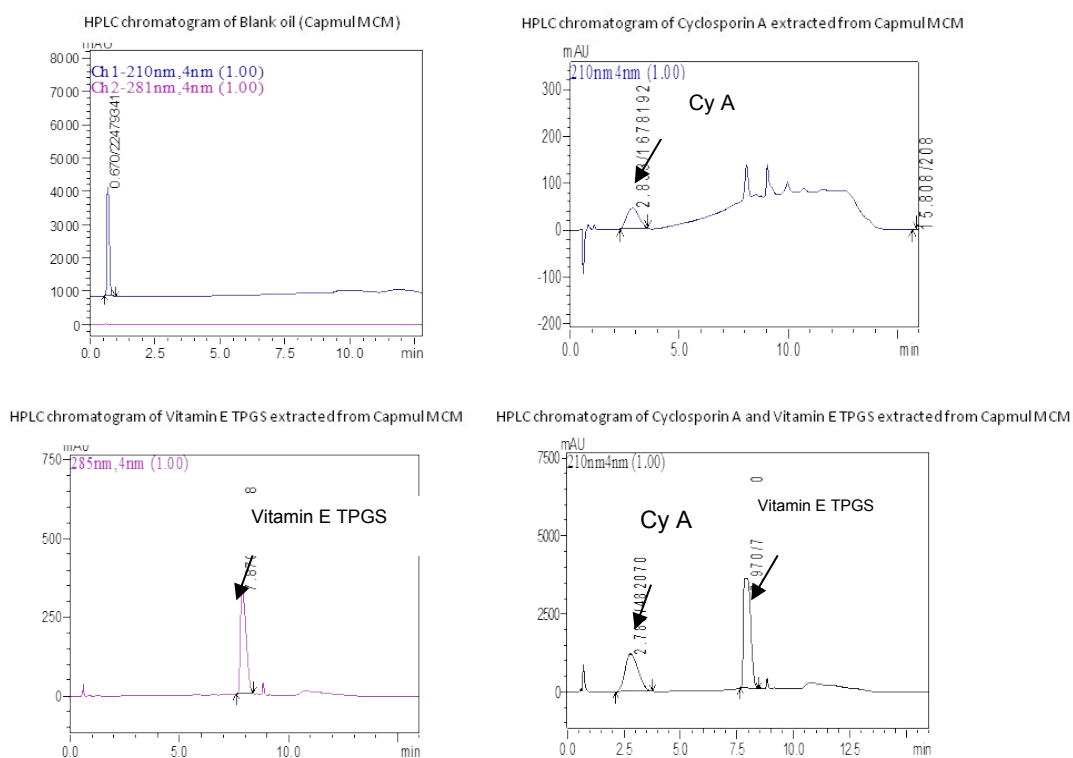

Figure S1: HPLC chromatogram of different samples after compatibility studies

### Solubility of CyA in surfactant solution

Solubility studies of CyA were also performed in aqueous solution of 10% surfactants as shown in **Figure**.

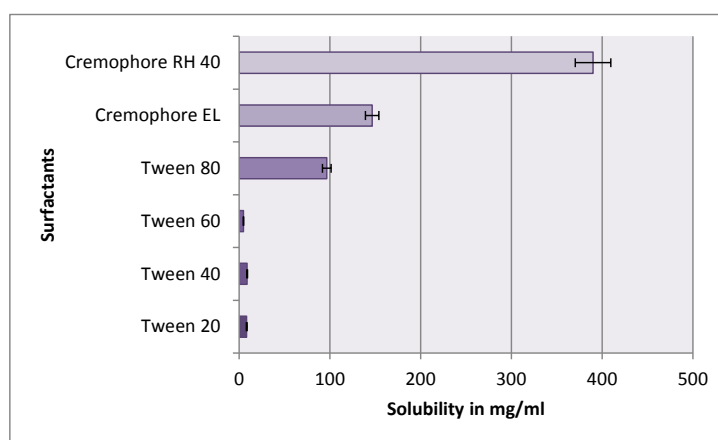

Figure S2. Solubility of CyA in 10% Surfactants; Each data point represents mean  $\pm$  S.D.

(n=6)

## Effect of Cyclosporin A and vitamin E TPGS on ternary phase diagram of selected system

### *Effect of Cyclosporin A on ternary phase diagrams of the selected system*

The drugs as well as pH of the vehicle have considerable influence on the phase behaviour of the spontaneously emulsifying systems. The effect of CyA on the phase behaviour and area of nanoemulsion formation was studied. Due to the high solubility of CyA in Capmul MCM, a particular quantity of CyA (25 mg/gm of formulation) was taken and various compositions were prepared and characterized. The mean globule size of the resulting dispersions was measured by using Zetasizer at 25°C and the data obtained was used to identify the area of nanoemulsion formation.

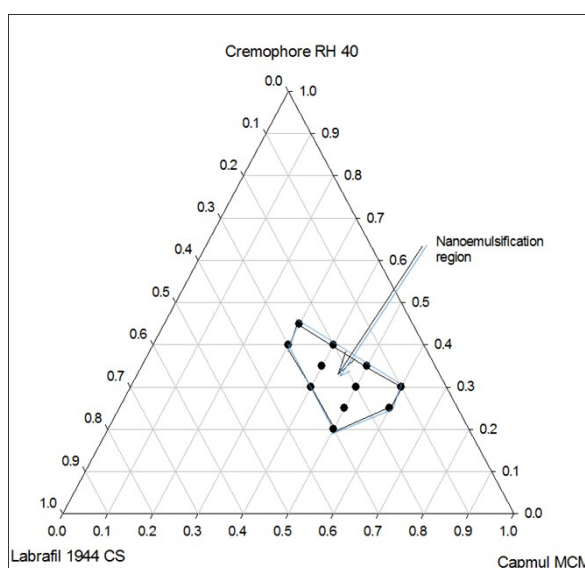

Figure S3: Effect of CyA on ternary phase diagram of the selected system

### *Effect of simultaneous loading of Cyclosporin A and vitamin E TPGS on ternary phase diagram*

In order to study the effect of simultaneous loading of CyA and vitamin E TPGS loading on the droplet size, the amount of CyA was fixed (25mg/gm formulation). The loading of vitamin E TPGS in the formulation was varied (20-200 mg/gm of formulation). Formulations with various compositions containing CyA and vitamin E TPGS were prepared. The mean globule size and PDI of the resultant nano emulsions were measured by zeta sizer at 25°C and the self-emulsification region was investigated by plotting onto the pseudoternary phase diagram.

**Table S1.** Effect of Vitamin E TPGS loading on the quality attributes of representative SNEDDS\*

| Oil- | 20 mg/gm formulation | 40 mg/gm formulation | 80 mg/gm formulation | 200 mg/gm formulation |
|------|----------------------|----------------------|----------------------|-----------------------|
|------|----------------------|----------------------|----------------------|-----------------------|

| surfactant-cosurfactant ratio | Size           | PDI             | %T              | Size            | PDI             | %T              | Size            | PDI             | %T              | Size            | PDI              | %T              |
|-------------------------------|----------------|-----------------|-----------------|-----------------|-----------------|-----------------|-----------------|-----------------|-----------------|-----------------|------------------|-----------------|
|                               | 50-35-15%      | 27.2±<br>5.27   | 0.096±<br>0.189 | 83.36±<br>10.27 | 26.03±<br>6.48  | 0.055±<br>0.257 | 84.91±<br>12.08 | 60.01±<br>5.78  | 0.141±<br>0.205 | 93.32±<br>15.48 | 239.3±<br>6.84   | 0.354±<br>0.542 |
| 50-30-20%                     | 30.99±<br>7.85 | 0.088±<br>0.259 | 60.81±<br>7.45  | 33.28±<br>5.87  | 0.151±<br>0.485 | 87.29±<br>8.80  | 33.97±<br>4.27  | 0.295±<br>0.054 | 85.11±<br>9.87  | 237.3±<br>7.24  | 0.438±<br>0.028  | 85.31±<br>2.63  |
| 40-40-20%                     | 26.01±<br>2.68 | 0.144±<br>0.197 | 66.68±<br>6.27  | 37.36±<br>8.26  | 0.283±<br>0.284 | 81.28±<br>7.27  | 22.62±<br>7.48  | 0.12±0.<br>186  | 89.53±<br>4.26  | 76.45±<br>3.47  | 0.246±<br>0.3456 | 87.9±<br>4.95   |
| 40-30-30%                     | 31.67±<br>3.44 | 0.079±<br>0.152 | 86.29±<br>14.76 | 283.7±<br>4.43  | 0.435±<br>0.179 | 82.9±1<br>6.47  | 31.41±<br>8.46  | 0.223±<br>0.247 | 88.88±<br>5.24  | 27.29±<br>2.48  | 0.328±<br>0.094  | 87.7±<br>.36    |

\*Amount of CyA was fixed as 25 mg/gm of formulation

Values are expressed as mean ± S.D. (n=6)

**Table S2.** HPLC method parameters for *in vitro* sample analysis

|                  |                                                 |
|------------------|-------------------------------------------------|
| Column           | Nucleosil®50 Symmetry RP-18 endcapped (5µm)     |
| Mobile Phase     | Acetonitrile : Water : Ethanol-30:40:30         |
| Elution          | Low Pressure gradient                           |
| Flow Rate        | 1 ml/min                                        |
| Retention Time   | 2.8 min for CyA and 7.81 min for vitamin E TPGS |
| Run Time         | 16.0 min                                        |
| Column Temp.     | 50 °C                                           |
| Pressure         | 500-800 psi                                     |
| $\lambda_{max}$  | 210 nm for CyA and 285 nm for vitamin E TPGS    |
| Injection Volume | 20 µl                                           |

**Table S3:** HPLC method validation parameters for Cyclosporin A

| Parameter | Value           |
|-----------|-----------------|
| Range     | 5-500 µg/ml     |
| Linearity | 0.9991±0.001041 |
| LOD       | 0.5776          |
| LOQ       | 1.764           |
| Slope     | 47194.5±103.8   |
| Intercept | 29025±182.24    |

Values are expressed as mean ± S.D. (n=6)

**Table S4.** HPLC method validation parameters for vitamin E TPGS

| Parameter | Value          |
|-----------|----------------|
| Range     | 5-500 µg/ml    |
| Linearity | 0.99888±0.0009 |
| LOD       | 0.6743         |
| LOQ       | 1.8967         |
| Slope     | 789.895±94.819 |
| Intercept | 928.393±83.014 |

**Values are expressed as mean  $\pm$  S.D. (n=6)**
